# Supplementary material for: Omega-3 polyunsaturated fatty acids alleviate early brain injury after traumatic brain injury by inhibiting neuroinflammation and necroptosis
Source: PubMed Central journal article supplement (PMC9990778; doi:10.1515/tnsci-2022-0277), 2023-03-06
Supplement: tnsci-2022-0277-sm.pdf [file tnsci-2022-0277-sm.pdf]

## Supplementary material

**Table S1:** Neurological behavior scores

| Category                               | Behavior                                                                                                       | Score |
|----------------------------------------|----------------------------------------------------------------------------------------------------------------|-------|
| Spontaneous activity                   | Moved around, explored the environment, and approached at least three walls of the cage                        | 3     |
|                                        | Slightly affected moved, did not approach all sides, move hesitating, moved to least one upper rim of the cage | 2     |
|                                        | Severely affected moved, did not rise up at all and barely moved in the cage                                   | 1     |
|                                        | Did not move at all                                                                                            | 0     |
| Symmetry in the movement of four limbs | All four limbs extended symmetrically                                                                          | 3     |
|                                        | Limbs on left side extended less or more slowly than those on the right                                        | 2     |
|                                        | Limbs on left side showed minimal movement                                                                     | 1     |
|                                        | Forelimb on left side did not move at all                                                                      | 0     |
| Forepaw outstretching                  | Both forelimbs were outstretched, forepaws walked symmetrically                                                | 3     |
|                                        | Left side outstretched less than the right, and forepaw walking was impaired                                   | 2     |
|                                        | Left forelimb moved minimally                                                                                  | 1     |
|                                        | Left forelimb did not move                                                                                     | 0     |
| Climbing                               | Climbed easily and gripped tightly to the wire                                                                 | 3     |
|                                        | Left side impaired while climbing or did not grip as hard as the right side                                    | 2     |
|                                        | Failed to climb or tended to circle instead of climbing                                                        | 1     |
| Body proprioception                    | Reacted by turning head and was equally startled by the stimulus on both sides                                 | 3     |
|                                        | Reacted slowly to stimulus on left side                                                                        | 2     |
|                                        | Did not respond to the stimulus placed on the left side                                                        | 1     |
| Response to vibrissae touch            | Reacted by turning head or was equally startled by the stimulus on both sides                                  | 3     |
|                                        | Reacted slowly to stimulus on left side                                                                        | 2     |
|                                        | Did not respond to stimulus on the left side                                                                   | 1     |
